# Supplementary material for: Tracing the Evolutionary Pathways of Serogroup O78 Avian Pathogenic Escherichia coli
Source: MDPI journal article supplement (doi:10.3390/antibiotics12121714), 2023-12-09
Supplement: s1 [file s1]

## Supplementary Figures

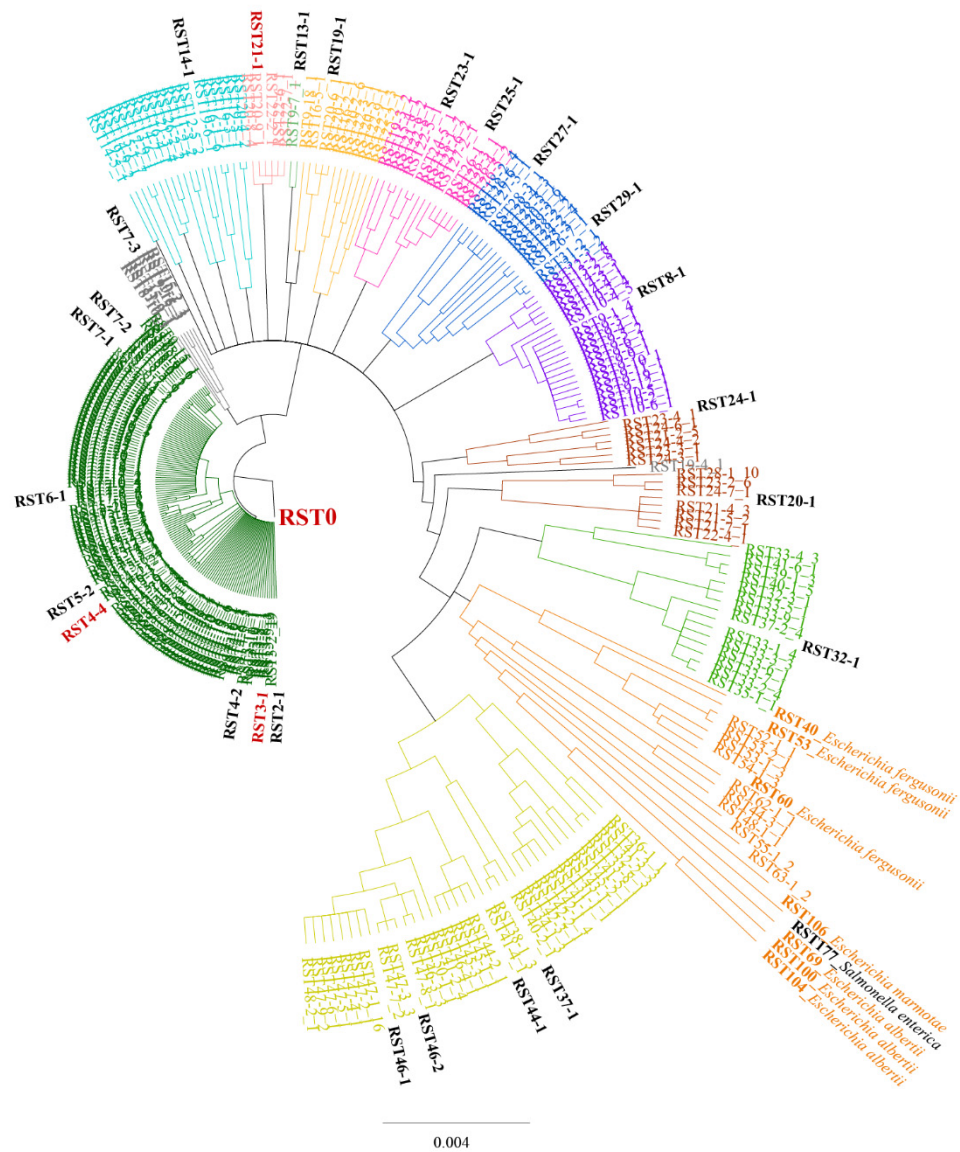

**Figure S1.** Bayesian phylogenetic analysis of *E. coli* *rpoB* sequence types presented as a circular tree, constructed using MrBayes V.2.2.4. The tree was rooted using RST0 as the outgroup (consensus sequence). A dark green section corresponds to Branch I-1 from the network analysis shown in Figure 1. Predominantly prevalent RST numbers are highlighted in bold.



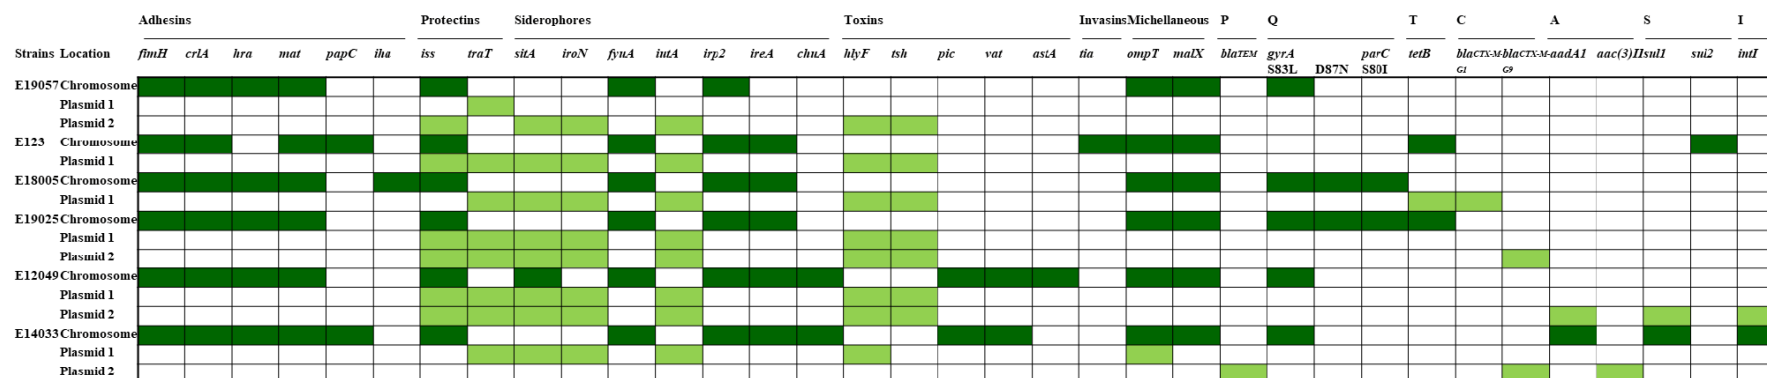

**Figure S3.** The location of virulence genes and antibiotic resistance genes in the O78 APEC genome is depicted in the diagram. Dark green signifies genes located in chromosomal DNA, while light green represents those carried on plasmid DNA. P, penicillins; Q, quinolones; T, tetracyclines; C, cephalosporins; A, aminoglycosides; S, sulfonamides; I, integron.
